# Supplementary material for: Clinical exome-based panel testing for medically actionable secondary findings in a cohort of 383 Italian participants
Source: Front Genet. 2022 Nov 10;13:956723. doi: 10.3389/fgene.2022.956723 (PMC9685519; doi:10.3389/fgene.2022.956723)
Supplement: Supplementary file 2 [file Table3.xlsx]

## Sheet: Supp Table 3
Supplemental Table 3. ClinVar rare variants with conflicting interpretations of pathogenicity
ID	HOMO_REF_COUNTS	HET_COUNTS	HOMO_ALT_COUNTS	ALT_FREQ	Chr	Start	End	Ref	Alt	Func.refGene	Gene.refGene	GeneDetail.refGene	ExonicFunc.refGene	AAChange.refGene	cytoBand	avsnp150	CLNALLELEID	CLNDISDB	CLNREVSTAT	CLNSIG	1000G_ALL	ExAC_ALL	gnomAD_exome_ALL	gnomAD_genome_ALL	SIFT_pred	Polyphen2_HDIV_pred	LRT_pred	MutationTaster_pred	MutationAssessor_pred	FATHMM_pred	CADD_phred
chr1:156108510:C:T	0	2	0	0.5	1	156108510	156108510	C	T	exonic	LMNA	-	nonsynonymous SNV	LMNA:NM_170708:exon10:c.C1840T:p.R614C	1q22	rs142000963	14527	Primary_dilated_cardiomyopathy|Cardiomyopathy|Dilated_cardiomyopathy_1A|Charcot-Marie-Tooth_disease|Monogenic_diabetes|Charcot-Marie-Tooth_disease,_type_2|Variant_of_unknown_significance|not_specified|Cardiovascular_phenotype|not_provided	criteria_provided,_conflicting_interpretations	Conflicting_interpretations_of_pathogenicity	0.0004	0.0012	0.0012	0.0013	D	D	D	D	N	D	21
chr1:201047133:C:A	0	3	0	0.5	1	201047133	201047133	C	A	exonic	CACNA1S	-	nonsynonymous SNV	CACNA1S:NM_000069:exon11:c.G1493T:p.R498L,	1q32.1	rs150590855	279727	Malignant_hyperthermia,_susceptibility_to,_5|Hypokalemic_periodic_paralysis_1|not_specified|not_provided	criteria_provided,_conflicting_interpretations	Conflicting_interpretations_of_pathogenicity	0.0006	0.0007	0.0006	0.0008	D	D	D	D	M	D	32
chr1:237586435:C:T	0	1	0	0.5	1	237586435	237586435	C	T	exonic	RYR2	-	nonsynonymous SNV	RYR2:NM_001035:exon12:c.C892T:p.R298C,	1q43	rs551099887	463649	Cardiomyopathy|Catecholaminergic_polymorphic_ventricular_tachycardia|not_specified|not_provided	criteria_provided,_conflicting_interpretations	Conflicting_interpretations_of_pathogenicity	0.0002	0.0001	8.947e-05	0.0004	D	D	D	D	M	D	14.49
chr1:237617878:C:T	0	1	0	0.5	1	237617878	237617878	C	T	intronic	RYR2	c.1476+4C>T	-	-	1q43	rs369442980	43747	Human_Phenotype_Ontology:HP:0001638,MONDO:MONDO:0004994,MedGen:C0878544,Orphanet:ORPHA167848,SNOMED_CT:85898001|MONDO:MONDO:0017990,MedGen:C1631597,OMIM:PS604772,Orphanet:ORPHA3286|MedGen:CN169374|MedGen:CN230736|MedGen:CN517202	criteria_provided,_conflicting_interpretations	Conflicting_interpretations_of_pathogenicity	0.0002	0.0002	0.0001	6.465e-05	-	-	-	-	-	-	-
chr1:237875040:C:T	0	1	0	0.5	1	237875040	237875040	C	T	intronic	RYR2	c.10231-5C>T	-	-	1q43	rs186326951	138954	Human_Phenotype_Ontology:HP:0001638,MONDO:MONDO:0004994,MedGen:C0878544,Orphanet:ORPHA167848,SNOMED_CT:85898001|MONDO:MONDO:0010975,MedGen:C1832931,OMIM:600996|MONDO:MONDO:0011484,MedGen:C4053736,OMIM:604772|MONDO:MONDO:0017990,MedGen:C1631597,OMIM:PS604772,Orphanet:ORPHA3286|MedGen:CN169374|MedGen:CN517202	criteria_provided,_conflicting_interpretations	Conflicting_interpretations_of_pathogenicity	0.0006	0.001	0.0005	0.0002	-	-	-	-	-	-	-
chr1:45797835:T:G	0	1	0	0.5	1	45797835	45797835	T	G	intronic	MUTYH	c.849+3A>C	-	-	1p34.1	rs587780751	135992	Human_Phenotype_Ontology:HP:0003003,Human_Phenotype_Ontology:HP:0006718,MONDO:MONDO:0021063,MedGen:C0007102,SNOMED_CT:363406005|MONDO:MONDO:0002032,MedGen:C0699790,SNOMED_CT:269533000|MONDO:MONDO:0012041,MedGen:C3272841,OMIM:608456,Orphanet:ORPHA247798|MONDO:MONDO:0015356,MedGen:C0027672,Orphanet:ORPHA140162,SNOMED_CT:699346009|MedGen:CN517202	criteria_provided,_conflicting_interpretations	Conflicting_interpretations_of_pathogenicity	-	0.0001	7.311e-05	6.466e-05	-	-	-	-	-	-	-
chr10:43600559:T:C	0	2	0	0.5	10	43600559	43600559	T	C	exonic	RET	-	nonsynonymous SNV	RET:NM_001355216:exon1:c.T23C:p.V8A	10q11.21	rs139790943	41845	Hirschsprung_disease|Pheochromocytoma|Malignant_tumor_of_breast|Hirschsprung_disease_1|Multiple_endocrine_neoplasia,_type_2a|Hereditary_cancer-predisposing_syndrome|Multiple_endocrine_neoplasia|Multiple_endocrine_neoplasia,_type_2|Renal_hypodysplasia/aplasia_1|not_specified|not_provided	criteria_provided,_conflicting_interpretations	Conflicting_interpretations_of_pathogenicity	0.0002	0.0002	0.0003	0.0002	D	P	D	D	L	D	21.8
chr10:43608351:G:A	0	1	0	0.5	10	43608351	43608351	G	A	exonic	RET	-	nonsynonymous SNV	RET:NM_001355216:exon6:c.G937A:p.D313N	10q11.21	rs147219360	136103	Pheochromocytoma|Hirschsprung_disease_1|Hereditary_cancer-predisposing_syndrome|Multiple_endocrine_neoplasia|Multiple_endocrine_neoplasia,_type_2|Renal_hypodysplasia/aplasia_1|not_specified|not_provided	criteria_provided,_conflicting_interpretations	Conflicting_interpretations_of_pathogenicity	-	0.0002	0.0002	9.702e-05	D	D	D	D	M	D	21.2
chr10:88681353:G:A	0	1	0	0.5	10	88681353	88681353	G	A	exonic	BMPR1A	-	nonsynonymous SNV	BMPR1A:NM_004329:exon11:c.G1243A:p.E415K,	10q23.2	rs140592056	41779	Malignant_tumor_of_breast|Generalized_juvenile_polyposis/juvenile_polyposis_coli|Hereditary_cancer-predisposing_syndrome|Juvenile_polyposis_syndrome|not_specified|Gastrointestinal_polyposis|not_provided	criteria_provided,_conflicting_interpretations	Conflicting_interpretations_of_pathogenicity	0.0004	0.0007	0.0009	0.0002	D	D	D	D	L	D	37
chr10:88681437:C:T	0	1	0	0.5	10	88681437	88681437	C	T	exonic	BMPR1A	-	nonsynonymous SNV	BMPR1A:NM_004329:exon11:c.C1327T:p.R443C,	10q23.2	rs35619497	133717	Carcinoma_of_colon|Generalized_juvenile_polyposis/juvenile_polyposis_coli|Hereditary_mixed_polyposis_syndrome_2|Hereditary_cancer-predisposing_syndrome|Juvenile_polyposis_syndrome|not_specified|not_provided	criteria_provided,_conflicting_interpretations	Conflicting_interpretations_of_pathogenicity	0.001	0.0006	0.0007	0.0004	D	D	D	D	M	D	32
chr10:90701048:C:T	0	1	0	0.5	10	90701048	90701048	C	T	exonic	ACTA2	-	nonsynonymous SNV	ACTA2:NM_001141945:exon6:c.G554A:p.R185Q	10q23.31	rs1057521105	381615	Aortic_aneurysm,_familial_thoracic_6|not_provided	criteria_provided,_conflicting_interpretations	Conflicting_interpretations_of_pathogenicity	-	-	-	-	D	D	D	D	H	D	26.6
chr11:47359115:C:T	0	1	0	0.5	11	47359115	47359115	C	T	exonic	MYBPC3	-	nonsynonymous SNV	MYBPC3:NM_000256:exon24:c.G2429A:p.R810H,	11p11.2	rs375675796	42620	Cardiomyopathy|Hypertrophic_cardiomyopathy|Familial_hypertrophic_cardiomyopathy_4|Primary_familial_hypertrophic_cardiomyopathy|not_specified|Cardiovascular_phenotype|not_provided	criteria_provided,_conflicting_interpretations	Conflicting_interpretations_of_pathogenicity	-	0	4.874e-05	-	D	D	-	D	M	T	33
chr13:32914478:G:A	0	1	0	0.5	13	32914478	32914478	G	A	exonic	BRCA2	-	nonsynonymous SNV	BRCA2:NM_000059:exon11:c.G5986A:p.A1996T,	13q13.1	rs80358833	51982	Hereditary_breast_and_ovarian_cancer_syndrome|Fanconi_anemia,_complementation_group_D1|Breast-ovarian_cancer,_familial_2|Hereditary_cancer-predisposing_syndrome|not_specified|not_provided	criteria_provided,_conflicting_interpretations	Conflicting_interpretations_of_pathogenicity	0.0014	0.0005	0.0005	6.462e-05	D	D	N	D	M	D	20.3
chr13:48937016:C:T	0	1	0	0.5	13	48937016	48937016	C	T	exonic	RB1	-	nonsynonymous SNV	RB1:NM_000321:exon8:c.C784T:p.R262W,	13q14.2	rs556201144	410942	Retinoblastoma	criteria_provided,_conflicting_interpretations	Conflicting_interpretations_of_pathogenicity	-	-	1.626e-05	-	D	D	D	D	L	D	28.4
chr13:52524268:C:T	0	2	0	0.5	13	52524268	52524268	C	T	exonic	ATP7B	-	nonsynonymous SNV	ATP7B:NM_001005918:exon8:c.G2119A:p.G707R	13q14.3	rs191312027	157939	Wilson_disease|Inborn_genetic_diseases|not_provided	criteria_provided,_conflicting_interpretations	Conflicting_interpretations_of_pathogenicity	0.001	0.0007	0.0007	0.0011	D	D	D	D	H	D	21.7
chr13:52535997:A:G	0	2	0	0.5	13	52535997	52535997	A	G	exonic	ATP7B	-	nonsynonymous SNV	ATP7B:NM_000053:exon6:c.T1922C:p.L641S	13q14.3	rs186924074	420002	Wilson_disease|not_specified|not_provided	criteria_provided,_conflicting_interpretations	Conflicting_interpretations_of_pathogenicity	0.0004	0.0004	0.0005	0.0003	D	D	D	D	M	D	20.6
chr13:52585453:CTG:C	0	1	0	0.333333	13	52585454	52585455	TG	-	exonic	ATP7B	-	frameshift deletion	ATP7B:NM_000053:exon1:c.19_20del:p.Q7Dfs*14	13q14.3	rs749363958	419611	Wilson_disease|not_specified|not_provided	MONDO:MONDO:0010200,MedGen:C0019202,OMIM:277900,Orphanet:ORPHA905,SNOMED_CT:88518009|MedGen:CN169374|MedGen:CN517202	criteria_provided,_conflicting_interpretations	0.0015	-	-	6.497e-05	-	-	-	-	-	-	-
chr14:23898560:G:A	0	1	0	0.5	14	23898560	23898560	G	A	intronic	MYH7	c.1139-4C>T	-	-	14q11.2	rs1002975890	312914	Human_Phenotype_Ontology:HP:0001638,MONDO:MONDO:0004994,MedGen:C0878544,Orphanet:ORPHA167848,SNOMED_CT:85898001|Human_Phenotype_Ontology:HP:0011664,MedGen:C4021133|MONDO:MONDO:0008050,MedGen:C4552004,OMIM:160500,Orphanet:ORPHA59135|MONDO:MONDO:0008647,MedGen:C3495498,OMIM:192600|MONDO:MONDO:0012018,MedGen:C1842160,OMIM:608358,SNOMED_CT:699267007|MONDO:MONDO:0013262,MedGen:C1834481,OMIM:613426	criteria_provided,_conflicting_interpretations	Conflicting_interpretations_of_pathogenicity	-	-	8.129e-06	-	-	-	-	-	-	-	-
chr15:48782174:C:T	0	1	0	0.5	15	48782174	48782174	C	T	exonic	FBN1	-	nonsynonymous SNV	FBN1:NM_000138:exon25:c.G2956A:p.A986T,	15q21.1	rs112287730	36060	Geleophysic_dysplasia|Connective_tissue_disorder|Acromicric_dysplasia|Ectopia_lentis,_isolated,_autosomal_dominant|Marfan_syndrome|Stiff_skin_syndrome|Weill-Marchesani_syndrome|Familial_thoracic_aortic_aneurysm_and_aortic_dissection|not_specified|Cardiovascular_phenotype|not_provided	criteria_provided,_conflicting_interpretations	Conflicting_interpretations_of_pathogenicity	0.0002	0.0015	0.0012	0.0018	T	P	D	D	M	D	25.4
chr15:48812976:C:T	0	1	0	0.5	15	48812976	48812976	C	T	exonic	FBN1	-	nonsynonymous SNV	FBN1:NM_000138:exon10:c.G1027A:p.G343R,	15q21.1	rs146726731	161244	Geleophysic_dysplasia|Connective_tissue_disorder|Acromicric_dysplasia|Ectopia_lentis,_isolated,_autosomal_dominant|Marfan_syndrome|Stiff_skin_syndrome|Weill-Marchesani_syndrome|Familial_thoracic_aortic_aneurysm_and_aortic_dissection|not_specified|Cardiovascular_phenotype|not_provided	criteria_provided,_conflicting_interpretations	Conflicting_interpretations_of_pathogenicity	0.0002	0.0002	0.0002	0.0002	T	D	D	D	M	D	35
chr16:15812241:C:G	0	1	0	0.5	16	15812241	15812241	C	G	exonic	MYH11	-	nonsynonymous SNV	MYH11:NM_002474:exon37:c.G5226C:p.E1742D	16p13.11	rs144421849	318101	Aortic_aneurysm,_familial_thoracic_4|Familial_thoracic_aortic_aneurysm_and_aortic_dissection|Cardiovascular_phenotype|Lissencephaly,_Recessive|not_provided	criteria_provided,_conflicting_interpretations	Conflicting_interpretations_of_pathogenicity	0.0012	0.0007	0.0006	0.0001	D	D	D	D	M	T	21.3
chr16:15844048:G:A	0	1	0	0.5	16	15844048	15844048	G	A	exonic	MYH11	-	nonsynonymous SNV	MYH11:NM_002474:exon16:c.C2005T:p.R669C	16p13.11	rs111404182	161319	Aortic_aneurysm,_familial_thoracic_4|Familial_thoracic_aortic_aneurysm_and_aortic_dissection|not_specified|Cardiovascular_phenotype|not_provided	criteria_provided,_conflicting_interpretations	Conflicting_interpretations_of_pathogenicity	0.0002	0.0006	0.0007	0.0005	D	D	D	D	M	D	21.5
chr16:2113058:C:T	0	1	0	0.5	16	2113058	2113058	C	T	intronic	TSC2	c.1443+4C>T	-	-	16p13.3	rs45517172	49742	MONDO:MONDO:0013199,MedGen:C1860707,OMIM:613254|MONDO:MONDO:0015356,MedGen:C0027672,Orphanet:ORPHA140162,SNOMED_CT:699346009|MedGen:C0041341,OMIM:PS191100,Orphanet:ORPHA805,SNOMED_CT:7199000|MedGen:CN169374	criteria_provided,_conflicting_interpretations	Conflicting_interpretations_of_pathogenicity	-	0	0.0002	0.0001	-	-	-	-	-	-	-
chr16:2138565:G:A	0	1	0	0.5	16	2138565	2138565	G	A	exonic	TSC2	-	nonsynonymous SNV	TSC2:NM_001318831:exon38:c.G4646A:p.R1549Q	16p13.3	rs45506695	49941	Tuberous_sclerosis_2|Hereditary_cancer-predisposing_syndrome|Tuberous_sclerosis_syndrome|not_specified	criteria_provided,_conflicting_interpretations	Conflicting_interpretations_of_pathogenicity	-	0.0001	0.0001	3.231e-05	D	D	D	D	L	D	23.7
chr17:7578555:C:CT	0	2	0	0.5	17	7578555	7578555	-	T	splicing	TP53	c.376-2dupA	-	-	17p13.1	rs751253294	185593	MONDO:MONDO:0015356,MedGen:C0027672,Orphanet:ORPHA140162,SNOMED_CT:699346009|MONDO:MONDO:0018875,MedGen:C0085390,OMIM:PS151623,Orphanet:ORPHA524,SNOMED_CT:428850001|MedGen:CN169374|MedGen:CN517202	criteria_provided,_conflicting_interpretations	Conflicting_interpretations_of_pathogenicity	-	0	8.172e-06	-	-	-	-	-	-	-	-
chr19:11221390:G:A	0	1	0	0.5	19	11221390	11221390	G	A	exonic	LDLR	-	nonsynonymous SNV	LDLR:NM_001195800:exon5:c.G499A:p.G167S	19p13.2	rs544453230	183105	Familial_hypercholesterolemia|Familial_hypercholesterolemia_1|Homozygous_familial_hypercholesterolemia|not_provided	criteria_provided,_conflicting_interpretations	Conflicting_interpretations_of_pathogenicity	0.0002	0	2.847e-05	3.23e-05	D	D	D	D	N	D	22
chr2:21229068:G:A	0	1	0	0.5	2	21229068	21229068	G	A	exonic	APOB	-	nonsynonymous SNV	APOB:NM_000384:exon26:c.C10672T:p.R3558C,	2p24.1	rs12713559	17897	Familial_hypercholesterolemia|Familial_hypercholesterolemia_1|Familial_hypercholesterolemia_2|Hypobetalipoproteinemia,_familial,_1|not_specified|not_provided	criteria_provided,_conflicting_interpretations	Conflicting_interpretations_of_pathogenicity	0.0002	0.0003	0.0003	0.0005	D	D	D	A	M	T	22.5
chr2:21249840:A:T	0	3	0	0.5	2	21249840	21249840	A	T	intronic	APOB	c.2068-4T>A	-	-	2p24.1	rs41291161	402372	MONDO:MONDO:0005439,MedGen:C0020445,OMIM:PS143890,SNOMED_CT:398036000|MONDO:MONDO:0007750,MedGen:C0745103,OMIM:143890,SNOMED_CT:397915002|MONDO:MONDO:0007751,MedGen:C1704417,OMIM:144010|MONDO:MONDO:0014252,MedGen:C4551990,OMIM:615558|MedGen:CN169374|MedGen:CN517202	criteria_provided,_conflicting_interpretations	Conflicting_interpretations_of_pathogenicity	0.0006	0.0013	0.0013	0.0008	-	-	-	-	-	-	-
chr2:48032753:T:A	0	1	0	0.5	2	48032753	48032753	T	A	intronic	MSH6	c.3557-4T>A	-	-	2p16.3	-	455270	MONDO:MONDO:0015356,MedGen:C0027672,Orphanet:ORPHA140162,SNOMED_CT:699346009|MedGen:C0009405	criteria_provided,_conflicting_interpretations	Conflicting_interpretations_of_pathogenicity	-	-	-	-	-	-	-	-	-	-	-
chr3:10191605:C:T	0	2	0	0.5	3	10191605	10191605	C	T	exonic	VHL	-	nonsynonymous SNV	VHL:NM_198156:exon2:c.C475T:p.R159W	3p25.3	rs28940298	2232	Von_Hippel-Lindau_syndrome|Erythrocytosis,_familial,_2|Hereditary_cancer-predisposing_syndrome|Acute_leukemia_of_ambiguous_lineage|not_specified|not_provided	criteria_provided,_conflicting_interpretations	Conflicting_interpretations_of_pathogenicity	-	0.0002	0.0002	0.0001	D	D	D	A	L	D	22.4
chr3:37056023:C:T	0	1	0	0.5	3	37056023	37056023	C	T	exonic	MLH1	-	nonsynonymous SNV	MLH1:NM_001167619:exon8:c.C55T:p.L19F	3p22.2	rs63750642	90349	Hereditary_cancer-predisposing_syndrome|Hereditary_nonpolyposis_colorectal_neoplasms|not_provided	criteria_provided,_conflicting_interpretations	Conflicting_interpretations_of_pathogenicity	-	-	4.071e-06	-	T	D	D	D	M	D	32
chr3:38592408:C:T	0	1	0	0.5	3	38592408	38592408	C	T	exonic	SCN5A	-	nonsynonymous SNV	SCN5A:NM_001099405:exon27:c.G5401A:p.D1801N	3p22.2	rs137854619	9402	Cardiac_arrhythmia|Long_QT_syndrome|Brugada_syndrome_1|Brugada_syndrome|Congenital_long_QT_syndrome|Long_QT_syndrome_2/3,_digenic|not_specified|not_provided	criteria_provided,_conflicting_interpretations	Conflicting_interpretations_of_pathogenicity	-	0.0003	0.0003	9.695e-05	T	D	D	A	M	D	22.8
chr3:38598779:G:A	0	1	0	0.5	3	38598779	38598779	G	A	intronic	SCN5A	c.4246-4C>T	-	-	3p22.2	rs772447988	519246	MONDO:MONDO:0015263,MedGen:C1142166,OMIM:PS601144,Orphanet:ORPHA130,SNOMED_CT:418818005|MedGen:CN230736|MedGen:CN517202	criteria_provided,_conflicting_interpretations	Conflicting_interpretations_of_pathogenicity	-	0	1.218e-05	3.231e-05	-	-	-	-	-	-	-
chr3:38627537:G:T	0	1	0	0.5	3	38627537	38627537	G	T	intronic	SCN5A	c.2437-5C>A	-	-	3p22.2	rs72549411	139054	EFO:EFO_0004269,Human_Phenotype_Ontology:HP:0001656,Human_Phenotype_Ontology:HP:0001661,Human_Phenotype_Ontology:HP:0001665,Human_Phenotype_Ontology:HP:0001666,Human_Phenotype_Ontology:HP:0001687,Human_Phenotype_Ontology:HP:0001721,Human_Phenotype_Ontology:HP:0004351,Human_Phenotype_Ontology:HP:0005158,Human_Phenotype_Ontology:HP:0011675,MedGen:C0003811,SNOMED_CT:698247007|MONDO:MONDO:0007240,Med…	criteria_provided,_conflicting_interpretations	Conflicting_interpretations_of_pathogenicity	0.0004	0.0003	0.0004	0.0005	-	-	-	-	-	-	-
chr3:38655281:C:T	0	1	0	0.5	3	38655281	38655281	C	T	exonic	SCN5A	-	nonsynonymous SNV	SCN5A:NM_000335:exon6:c.G656A:p.R219H	3p22.2	rs878855296	242206	Cardiac_arrhythmia|Brugada_syndrome|not_specified|not_provided	criteria_provided,_conflicting_interpretations	Conflicting_interpretations_of_pathogenicity	-	-	0	-	D	D	D	D	H	D	29.7
chr3:38655290:G:A	0	1	0	0.5	3	38655290	38655290	G	A	exonic	SCN5A	-	nonsynonymous SNV	SCN5A:NM_000335:exon6:c.C647T:p.S216L	3p22.2	rs41276525	36767	Cardiac_arrhythmia|Ventricular_tachycardia|Progressive_familial_heart_block,_type_1A|Brugada_syndrome_1|Dilated_cardiomyopathy_1E|Paroxysmal_familial_ventricular_fibrillation_1|Long_QT_syndrome_3|Brugada_syndrome|Sick_sinus_syndrome_1,_autosomal_recessive|not_specified|Cardiovascular_phenotype|not_provided	criteria_provided,_conflicting_interpretations	Conflicting_interpretations_of_pathogenicity	0.0008	0.001	0.0007	0.0005	D	D	D	D	M	D	28.1
chr3:38671911:C:T	0	2	0	0.5	3	38671911	38671911	C	T	exonic	SCN5A	-	nonsynonymous SNV	SCN5A:NM_000335:exon3:c.G283A:p.V95I	3p22.2	rs199473054	67761	Cardiac_arrhythmia|Brugada_syndrome_1|Brugada_syndrome|not_specified|not_provided	criteria_provided,_conflicting_interpretations	Conflicting_interpretations_of_pathogenicity	0.0002	0	3.249e-05	-	D	D	D	D	M	D	34
chr3:46899901:C:T	0	1	0	0.5	3	46899901	46899901	C	T	exonic	MYL3	-	nonsynonymous SNV	MYL3:NM_000258:exon5:c.G532A:p.D178N,	3p21.31	rs145520567	43128	Cardiomyopathy|Hypertrophic_cardiomyopathy|not_specified|not_provided	criteria_provided,_conflicting_interpretations	Conflicting_interpretations_of_pathogenicity	0.0004	0.0003	0.0002	6.47e-05	D	D	D	D	M	D	27.1
chr6:7585988:GGGATCTCGCTCC:G	0	1	0	0.5	6	7585989	7586000	GGATCTCGCTCC	-	exonic	DSP	-	nonframeshift deletion	DSP:NM_004415.4:c.8508_8519del:p.S2837_G2840del	6p24.3	rs397516971	44975	Cardiomyopathy|Dilated_cardiomyopathy_with_woolly_hair_and_keratoderma|Arrhythmogenic_right_ventricular_dysplasia_8|not_specified|not_provided	Human_Phenotype_Ontology:HP:0001638,MONDO:MONDO:0004994,MedGen:C0878544,Orphanet:ORPHA167848,SNOMED_CT:85898001|MONDO:MONDO:0011581,MedGen:C1854063,OMIM:605676,Orphanet:ORPHA65282|MONDO:MONDO:0011831,MedGen:C1843896,OMIM:607450|MedGen:CN169374|MedGen:CN517202	criteria_provided,_conflicting_interpretations	0.0007	-	-	0.0002	-	-	-	-	-	-	-
chr7:150645550:G:A	0	1	0	0.5	7	150645550	150645550	G	A	exonic	KCNH2	-	nonsynonymous SNV	KCNH2:NM_172057:exon7:c.C1654T:p.R552C	7q36.1	rs201627778	191470	Cardiac_arrhythmia|Long_QT_syndrome|Long_QT_syndrome_2|not_specified|Cardiovascular_phenotype|not_provided	criteria_provided,_conflicting_interpretations	Conflicting_interpretations_of_pathogenicity	0.0002	0.0005	0.0005	0.0001	T	D	D	D	M	D	20.3
